# Supplementary material for: Exploring the Predictive Potential of Physiological Measures of Human Thermal Strain in Outdoor Environments in Hot and Humid Areas in Summer—A Case Study of Shanghai, China
Source: MDPI journal article supplement (doi:10.3390/ijerph20065017), 2023-03-12
Supplement: s1 [file s1]

**Table S2.** Detail information of each experiment spot and its sequence

| Square      | KIC  |      |      |      |      |      |      |      |      | Century |      |      |      |      |      | Guoge |      |      |      |      |      |      |
|-------------|------|------|------|------|------|------|------|------|------|---------|------|------|------|------|------|-------|------|------|------|------|------|------|
| Spot        | 1    | 2    | 3    | 4    | 5    | 6    | 7    | 8    | 9    | 1       | 2    | 3    | 4    | 5    | 6    | 1     | 2    | 3    | 4    | 5    | 6    | 7    |
| Sequence    | 1    | 2    | 3    | 4    | 5    | 6    | 7    | 8    | 9    | 1       | 2    | 3    | 4    | 5    | 6    | 1     | 2    | 3    | 4    | 5    | 6    | 7    |
| SVF         | 0.95 | 0.93 | 0.12 | 0.89 | 0.71 | 0.09 | 0.23 | 0.62 | 0.66 | 0.91    | 0.25 | 0.84 | 0.15 | 0.85 | 0.71 | 0.49  | 0.13 | 0.83 | 0.20 | 0.34 | 0.30 | 0.47 |
| Ground type | Gr   | Gr   | La   | Gr   | Gra  | Gra  | Gr   | WP   | Gra  | Gr      | Gr   | Gr   | Gr   | Gr   | Gr   | Wb    | Wb   | Wb   | La   | Wb   | La   | Gr   |
| Tope type   | Os   | Os   | Tc   | Os   | Os   | Cw   | Ba   | Os   | Os   | Os      | Tc   | Os   | Cw   | Os   | Os   | Tc    | Tc   | Os   | Tc   | Tc   | Tc   | Os   |

*Notes:* Gr: Granite; La: Lawn; Gra: Gravel; Wp: Wood platform; Wb: Water permeable brick; Os: Open sky; Tc: Tree canopy; Cw: Concrete wall; Ba: Bamboo.
