# Supplementary material for: Exploring the Predictive Potential of Physiological Measures of Human Thermal Strain in Outdoor Environments in Hot and Humid Areas in Summer—A Case Study of Shanghai, China
Source: MDPI journal article supplement (doi:10.3390/ijerph20065017), 2023-03-12
Supplement: s1 [file s1]

**Table S4.** Accuracy and range of each sensor of Ergo-Lab parameters.

| <b>Equipment</b>                                              | <b>Wearable wireless device</b> | <b>Range</b>     | <b>Accuracy</b> |
|---------------------------------------------------------------|---------------------------------|------------------|-----------------|
| Ergo-Lab “Human-Machine-Environment” synchronization platform | Skin temperature sensor         | 10 °C ~ 60 °C    | ±0.1°C          |
|                                                               | Skin conductance sensor         | 0 µs ~ 30 µs     | ±0.1µs          |
|                                                               | Photoplethysmography sensor     | 25 Bpm ~ 240 Bpm | 1 Bpm           |
