# Supplementary material for: Exploring the Predictive Potential of Physiological Measures of Human Thermal Strain in Outdoor Environments in Hot and Humid Areas in Summer—A Case Study of Shanghai, China
Source: MDPI journal article supplement (doi:10.3390/ijerph20065017), 2023-03-12
Supplement: s1 [file s1]

**Table S1.** Detail experiment information of each square

| <b>Square</b>  | <b>Experiment dates</b> | <b>Weather condition</b> | <b>Experiment time</b> |
|----------------|-------------------------|--------------------------|------------------------|
| KIC square     | July 20, 21, 28, 2018   | mostly clear to sunny    | 7:30 a.m.-17:30 p.m.   |
| Century square | August 4, 5, 6, 2018    | mostly clear to sunny    | 7:30 a.m.-17:30 p.m.   |
| Guoge square   | August 10, 11, 15, 2018 | mostly clear to sunny    | 7:30 a.m.-17:30 p.m.   |
