# Supplementary material for: Exploring the Predictive Potential of Physiological Measures of Human Thermal Strain in Outdoor Environments in Hot and Humid Areas in Summer—A Case Study of Shanghai, China
Source: MDPI journal article supplement (doi:10.3390/ijerph20065017), 2023-03-12
Supplement: s1 [file s1]

**Table S3.** Portable weather station parameter information

| Equipment            | Parameter         | Range                                      | Accuracy |
|----------------------|-------------------|--------------------------------------------|----------|
| Watchdog 2000 Series | Wind speed        | 0.3 ~ 241 km/h                             | ±3 km/h  |
|                      | Wind direction    | 0° ~ 360°                                  | ±4°      |
| Weather Station      | Air temperature   | -40°C ~ 125°C                              | ±0.4°C   |
|                      | Relative humidity | 0% ~ 100%                                  | ±2%      |
|                      | Solar radiation   | 1 W/m <sup>2</sup> ~ 1500 W/m <sup>2</sup> | ±5%      |
