# Supplementary material for: Exploring the Predictive Potential of Physiological Measures of Human Thermal Strain in Outdoor Environments in Hot and Humid Areas in Summer—A Case Study of Shanghai, China
Source: Int J Environ Res Public Health. 2023 Mar 12;20(6):5017. doi: 10.3390/ijerph20065017 (PMC10049132; doi:10.3390/ijerph20065017)
Supplement: Supplementary file 1 [file ijerph-20-05017-s001.zip]

Archive with 5 entries (5 files):
- Figure S1.Urban Square Outdoor Thermal Stress Questionnaire.jpg
- Table S1.Detail experiment information of each square.pdf
- Table S2.Detail information of each experiment spot and its sequence.pdf
- Table S3. Portable weather station parameter information.pdf
- Table S4. Accuracy and range of each sensor of Ergo-Lab parameters.pdf
